# Supplementary material
Source: ML conference proceedings conference paper supplement (https://openaccess.thecvf.com/content/WACV2024/html/Liao_Progressive_Hypothesis_Transformer_WACV_2024_paper.html)
Supplement: Supplementary file 1 [file Liao_Progressive_Hypothesis_Transformer_WACV_2024_supplemental.pdf]

# Supplementary Materials

## 1. Notation Table

The symbols used in this paper are summarized in Table 1.

| Symbol                  | Description                                                          |
|-------------------------|----------------------------------------------------------------------|
| $I$                     | The input image                                                      |
| $f_{enc}$               | The extracted feature from CNN and transformer encoder               |
| $f_{2D}$                | The feature for generating 2D hypotheses                             |
| $f_{3D}$                | The feature for generating 3D hypotheses                             |
| $f_{hmr}$               | The feature for generating SMPL parameters                           |
| $z_{2D}$                | The sampled latent feature in 2D HGM                                 |
| $z_{3D}$                | The sampled latent feature in 3D HGM                                 |
| $\mu_{2D}$              | Predicted mean for the 2D pose hypotheses distribution               |
| $\sigma_{2D}$           | Predicted standard deviation for the 2D pose hypotheses distribution |
| $\mu_{3D}$              | Predicted mean for the 3D pose hypotheses distribution               |
| $\sigma_{3D}$           | Predicted standard deviation for the 3D pose hypotheses distribution |
| $H_{2D\_heat}$          | 2D pose hypotheses in the form of 2D heatmap                         |
| $H_{3D}$                | 3D pose hypotheses in the form of 3D coordinates                     |
| $H_{3D \rightarrow 2D}$ | Projected 2D coordinates from $H_{3D}$                               |
| $H'_{2D\_heat}$         | 2D heatmap after making Gaussian blobs on $H_{3D \rightarrow 2D}$    |
| $f_{2D\_Sampled}$       | The sampled feature by $H_{2D\_heat}$                                |
| $f_{3D\_Sdampled}$      | The sampled feature by $H'_{2D\_heat}$                               |
| $\theta$                | Pose parameters of SMPL [4]                                          |
| $\beta$                 | Shape parameters of SMPL [4]                                         |
| $M$                     | The final mesh                                                       |
| $J_{3D}$                | The body joints regressed from $M$                                   |
| $K$                     | Number of hypotheses                                                 |
| $N_J$                   | Number of body joints                                                |

Table 1. A list of the symbols used in the main manuscript.

## 2. Hyperparameters

The hyperparameters adopted for training our framework are summarized in Table 2.

## 3. Visualization of Hypotheses

In this section, we present additional visualizations of 2D and 3D pose hypotheses, as depicted in Fig. 1. For the 2D

Table 2. A summary of the hyperparameters used in our framework.

| Hyperparameter Settings |                    |
|-------------------------|--------------------|
| Learning Rate           | $10^{-4}$          |
| Weight Decay Factor     | $10^{-4}$          |
| Betas                   | (0.9, 0.999)       |
| Batch Size              | 64                 |
| Image Crop Size         | $224 \times 224$   |
| Epochs                  | 60                 |
| $N_J$                   | 24                 |
| $k$                     | 81                 |
| $\lambda_{hmr}$         | 60                 |
| $\lambda_{pose}$        | 5                  |
| $\lambda_{smpl}$        | 1                  |
| $\lambda_{3D}$          | 300                |
| $\lambda_{2D}$          | 200                |
| $\lambda_{reg}$         | 10                 |
| Hardware Settings       |                    |
| CPU                     | AMD Ryzen™ 9 5950X |
| Main Memory             | 128GB              |
| GPU                     | NVIDIA RTX 3090    |
| GPU Memory              | 24GB               |

poses, we visualize the keypoints for the Right Ankle, Right Knee, Right Hip, Left Hip, Left Knee, and Left Ankle. For the 3D poses, we focus on the left and right wrists and the left and right ankles.

## 4. Visualization of Additional Qualitative Results

Fig. 2 presents the additional qualitative results of both FastMETRO [1] and our method on the Human3.6M and 3DPW datasets.

## 5. A Guideline for Reproduction

Our implementation follows the previous Transformer-based methods [1–3]. For detailed information and code, please refer to our anonymous repository: <https://anonymous.4open.science/r/Progressive-Hypothesis-Transformer-for-3D-Human-Mesh-Recovery>.

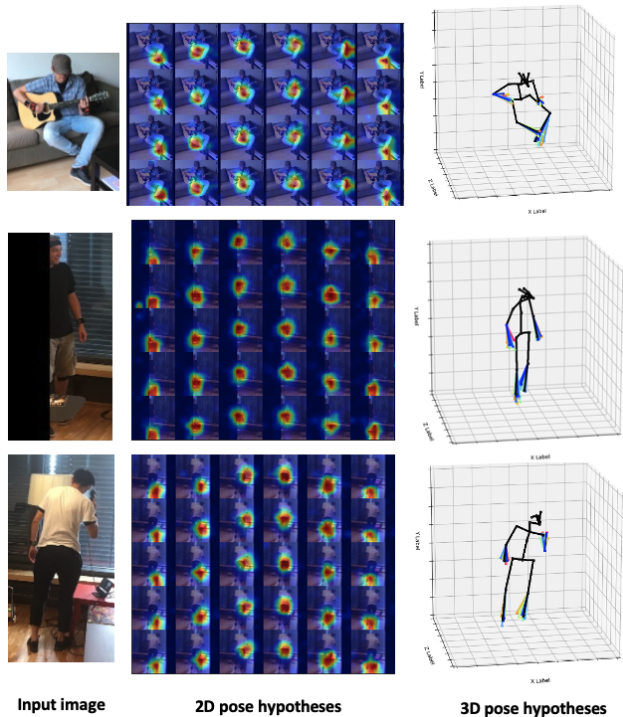

Figure 1. Visualization of our 2D/3D hypotheses. For 2D poses, we visualize the hypotheses of Right Ankle, Right Knee, Right Hip, Left Hip, Left Knee, and Left Ankle (from left to right on the image). For 3D poses, we visualize left and right wrists, as well as left and right ankles. Different colors represent different hypotheses.

## References

- [1] Junhyeong Cho, Kim Youwang, and Tae-Hyun Oh. Cross-attention of disentangled modalities for 3D human mesh recovery with transformers. In *Proc. European Conf. on Computer Vision (ECCV)*, pages 342–359, 2022. 1, 2
- [2] Kevin Lin, Lijuan Wang, and Zicheng Liu. End-to-end human pose and mesh reconstruction with transformers. In *Proc. IEEE Conf. on Computer Vision and Pattern Recognition (CVPR)*, pages 1954–1963, 2021. 1
- [3] Kevin Lin, Lijuan Wang, and Zicheng Liu. Mesh graphormer. In *Proc. IEEE Int. Conf. on Computer Vision (ICCV)*, pages 12939–12948, 2021. 1
- [4] Matthew Loper, Naureen Mahmood, Javier Romero, Gerard Pons-Moll, and Michael J. Black. SMPL: A skinned multi-person linear model. *ACM Trans. Graph. (TOG)*, 34(6), oct 2015. 1

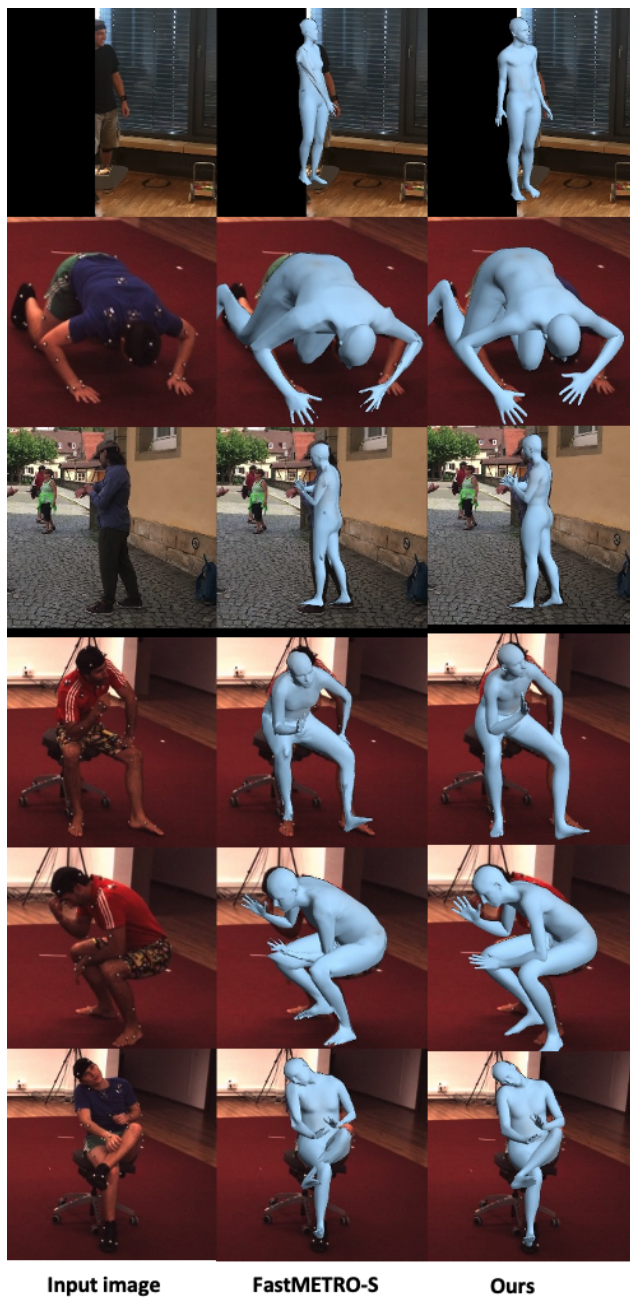

Figure 2. Qualitative comparisons of FastMETRO [1] and the proposed method on the Human3.6M and 3DPW datasets. Please note that our model size is comparable to that of FastMETRO-S.
